# Supplementary material for: Burnout, anxiety and depression risk in medical doctors working in KwaZulu-Natal Province, South Africa: Evidence from a multi-site study of resource-constrained government hospitals in a generalised HIV epidemic setting
Source: PubMed Central journal article supplement (PMC7556533; doi:10.1371/journal.pone.0239753), 2020-10-14
Supplement: pone.0239753.s002.pdf [file pone.0239753.s002.pdf]

**Table 1.**  
Socio-demographic and occupational profile in the ZABRE study on MDs (n=150)

|                            |                                               | N           | %          |
|----------------------------|-----------------------------------------------|-------------|------------|
| Age category:              | <30                                           | 54          | 36.0       |
|                            | 30-39                                         | 72          | 48.0       |
|                            | 40+                                           | 24          | 16.0       |
| Gender:                    | Male                                          | 66          | 44.0       |
|                            | Female                                        | 84          | 56.0       |
| Marital status:            | Single/Divorced                               | 79          | 52.7       |
|                            | Married                                       | 71          | 47.0       |
| Race:                      | Black                                         | 29          | 19.3       |
|                            | White/Coloured/Other                          | 35          | 23.3       |
|                            | Indian                                        | 86          | 57.3       |
| Highest qualification:     | MBChB or Diploma equivalent                   | 78          | 52.0       |
|                            | Specialist qualification - part I             | 36          | 24.0       |
|                            | Specialist qualification - part II            | 36          | 24.0       |
| Occupational rank          | Intern                                        | 39          | 26.0       |
|                            | Medical officer/clinical manager              | 55          | 36.7       |
|                            | Registrar                                     | 25          | 16.7       |
|                            | Specialist                                    | 31          | 20.7       |
| Discipline:                | General medicine                              | 33          | 22.0       |
|                            | Surgery                                       | 22          | 15.0       |
|                            | Psychiatry                                    | 20          | 13.0       |
|                            | Paediatrics                                   | 27          | 18.0       |
|                            | Obstetrics and gynaecology                    | 16          | 10.7       |
|                            | Family medicine/trauma and emergency medicine | 15          | 10.0       |
|                            | Anaesthetics                                  | 17          | 11.3       |
| Overtime (On and Off-site) | Combined hours                                | Mean = 91   | SD = 46.25 |
|                            |                                               | Median = 80 | IQR = 22   |
