# Supplementary material for: Burnout, anxiety and depression risk in medical doctors working in KwaZulu-Natal Province, South Africa: Evidence from a multi-site study of resource-constrained government hospitals in a generalised HIV epidemic setting
Source: PubMed Central journal article supplement (PMC7556533; doi:10.1371/journal.pone.0239753), 2020-10-14
Supplement: pone.0239753.s003.pdf [file pone.0239753.s003.pdf]

**Table 2.**  
Burnout, anxiety and depression by occupational rank in the ZABRE study on MDs

|                               |          |  | All     |         | Intern (n=39) |         | Medical Officers/Clinical Manager (n=55) |         | Registrar (n=25) |         | Specialist (n=31) |         | $\chi^2$ | df | P               |      |   |      |
|-------------------------------|----------|--|---------|---------|---------------|---------|------------------------------------------|---------|------------------|---------|-------------------|---------|----------|----|-----------------|------|---|------|
|                               |          |  | N       | %       | N             | %       | N                                        | %       | N                | %       | N                 | %       |          |    |                 |      |   |      |
| Emotional exhaustion (EE):    | High     |  | 73      | 48.7    | 24            | 61.5    | 22                                       | 40.0    | 15               | 60.0    | 12                | 38.7    | 8.69     | 6  | 0.19            |      |   |      |
|                               | Moderate |  | 32      | 21.3    | 7             | 17.9    | 14                                       | 25.5    | 2                | 8.0     | 9                 | 29.0    |          |    |                 |      |   |      |
|                               | Low      |  | 45      | 30.0    | 8             | 20.5    | 9                                        | 34.5    | 8                | 32.0    | 10                | 32.3    |          |    |                 |      |   |      |
| Depersonalisation (DP):       | High     |  | 68      | 45.3    | 27            | 69.2    | 17                                       | 30.9    | 11               | 44.0    | 13                | 29.0    | 22.8     | 6  | <b>&lt;0.01</b> |      |   |      |
|                               | Moderate |  | 33      | 22      | 7             | 17.9    | 16                                       | 29.1    | 7                | 28.0    | 3                 | 54.8    |          |    |                 |      |   |      |
|                               | Low      |  | 49      | 32.7    | 5             | 12.8    | 22                                       | 40.0    | 7                | 28.0    | 15                | 16.1    |          |    |                 |      |   |      |
| Burnout (High EE or High DP): | No       |  | 62      | 41.3    | 10            | 25.6    | 31                                       | 56.4    | 9                | 36.0    | 12                | 38.7    | 9.47     | 3  | <b>0.02</b>     |      |   |      |
|                               | Yes      |  | 88      | 58.7    | 29            | 74.4    | 24                                       | 43.6    | 16               | 64      | 19                | 61.3    |          |    |                 |      |   |      |
| Personal accomplishment (PA): | High     |  | 33      | 22.0    | 2             | 5.1     | 16                                       | 29.1    | 6                | 24.0    | 9                 | 29.0    | 14.6     | 6  | <b>0.02</b>     |      |   |      |
|                               | Moderate |  | 52      | 34.7    | 6             | 41      | 23                                       | 41.8    | 6                | 24.0    | 7                 | 22.6    |          |    |                 |      |   |      |
|                               | Low      |  | 65      | 43.3    | 21            | 53.8    | 16                                       | 29.1    | 13               | 52.0    | 15                | 48.4    |          |    |                 |      |   |      |
| GAD-7 ( $\geq 10$ ):          |          |  | Mdn = 5 | IQR = 7 | Mdn = 4       | IQR = 6 | Mdn = 5                                  | IQR = 7 | Mdn = 3          | IQR = 6 | Mdn = 5           | IQR = 9 | 0.14     | 3  | 0.99            |      |   |      |
|                               | No       |  | 120     | 80.0    | 32            | 82.1    | 44                                       | 80.0    | 22               | 88.0    | 22                | 71.0    |          |    |                 | 2.68 | 3 | 0.44 |
|                               | Yes      |  | 30      | 20.0    | 7             | 17.9    | 11                                       | 20.0    | 3                | 12.0    | 9                 | 29.0    |          |    |                 |      |   |      |
| PHQ-9 ( $\geq 10$ ):          |          |  | Mdn = 4 | IQR = 7 | Mdn = 4       | IQR = 8 | Mdn = 4                                  | IQR = 8 | Mdn = 3          | IQR = 4 | Mdn = 4           | IQR = 9 | 0.82     | 3  | 0.85            |      |   |      |
|                               | No       |  | 118     | 78.7    | 29            | 74.4    | 42                                       | 76.4    | 22               | 88.0    | 25                | 80.6    |          |    |                 | 1.98 | 3 | 0.58 |
|                               | Yes      |  | 32      | 21.3    | 10            | 25.6    | 13                                       | 23.6    | 3                | 12.0    | 6                 | 19.4    |          |    |                 |      |   |      |
