# Supplementary material for: Burnout, anxiety and depression risk in medical doctors working in KwaZulu-Natal Province, South Africa: Evidence from a multi-site study of resource-constrained government hospitals in a generalised HIV epidemic setting
Source: PubMed Central journal article supplement (PMC7556533; doi:10.1371/journal.pone.0239753), 2020-10-14
Supplement: pone.0239753.s004.pdf [file pone.0239753.s004.pdf]

**Table 3.**

Work environmental factors and burnout in the ZABRE study on MDs

|                                      |              | All |      | Burnout |      |     |      | $\chi^2$ | df | p     |
|--------------------------------------|--------------|-----|------|---------|------|-----|------|----------|----|-------|
|                                      |              | n   | %    | No      |      | Yes |      |          |    |       |
|                                      |              | n   | %    | n       | %    | n   | %    |          |    |       |
| Rate support by colleagues:          | Very good    | 35  | 23.6 | 17      | 27.4 | 18  | 20.9 | 2.04     | 3  | 0.56  |
|                                      | Good         | 56  | 37.8 | 25      | 40.3 | 31  | 36.0 |          |    |       |
|                                      | Satisfactory | 50  | 33.8 | 18      | 29.0 | 32  | 37.2 |          |    |       |
|                                      | Poor         | 7   | 4.7  | 2       | 3.2  | 5   | 5.8  |          |    |       |
| Rate clinical support by supervisor: | Very good    | 27  | 18.6 | 17      | 27.9 | 10  | 11.9 | 12.90    | 3  | <0.01 |
|                                      | Good         | 54  | 37.2 | 26      | 42.6 | 28  | 33.3 |          |    |       |
|                                      | Satisfactory | 48  | 33.1 | 16      | 26.2 | 32  | 38.1 |          |    |       |
|                                      | Poor         | 16  | 11.0 | 2       | 3.3  | 14  | 16.7 |          |    |       |
| Rate hospital structure resources:   | Good         | 6   | 4.2  | 5       | 8.3  | 1   | 1.2  | 14.56    | 2  | <0.01 |
|                                      | Satisfactory | 33  | 22.9 | 21      | 35.0 | 12  | 14.3 |          |    |       |
|                                      | Poor         | 105 | 72.9 | 34      | 56.7 | 71  | 84.5 |          |    |       |
| Rate impact on personal life:        | Very good    | 2   | 1.4  | 0       | 0.0  | 2   | 2.4  | 19.61    | 3  | <0.01 |
|                                      | Good         | 9   | 6.4  | 8       | 14.3 | 1   | 1.2  |          |    |       |
|                                      | Satisfactory | 67  | 47.5 | 33      | 58.9 | 34  | 40.0 |          |    |       |
|                                      | Poor         | 63  | 44.7 | 15      | 26.8 | 48  | 56.5 |          |    |       |
| Rate medical hospital staffing:      | Good         | 6   | 4.0  | 2       | 3.2  | 4   | 4.6  | 6.47     | 3  | 0.09  |
|                                      | Satisfactory | 44  | 29.5 | 25      | 40.3 | 19  | 21.8 |          |    |       |
|                                      | Poor         | 98  | 65.8 | 35      | 56.5 | 63  | 72.4 |          |    |       |
|                                      | None         | 1   | 0.7  | 0       | 0.0  | 1   | 1.1  |          |    |       |
| Rate academic support:               | Very good    | 3   | 2.4  | 2       | 3.7  | 1   | 1.4  | 7.10     | 4  | 0.13  |
|                                      | Good         | 39  | 31.2 | 23      | 42.6 | 16  | 22.5 |          |    |       |
|                                      | Satisfactory | 46  | 36.8 | 17      | 31.5 | 29  | 40.8 |          |    |       |
|                                      | Poor         | 34  | 27.2 | 11      | 20.4 | 23  | 32.4 |          |    |       |
|                                      | None         | 3   | 2.4  | 1       | 1.9  | 2   | 2.8  |          |    |       |
| Rate reimbursement:                  | Very good    | 2   | 1.4  | 2       | 3.3  | 0   | 0.0  | 6.88     | 4  | 0.14  |
|                                      | Good         | 17  | 11.6 | 5       | 8.2  | 12  | 14.0 |          |    |       |
|                                      | Satisfactory | 60  | 40.8 | 30      | 49.2 | 30  | 34.9 |          |    |       |
|                                      | Poor         | 43  | 29.3 | 16      | 26.2 | 27  | 31.4 |          |    |       |
|                                      | None         | 25  | 17.0 | 8       | 13.1 | 17  | 19.8 |          |    |       |

**Table 3. (continued)**

Work environmental factors and burnout in the ZABRE study on MDs

|                                                   |     | All |      | Burnout |      | Yes | %    | $\chi^2$ | df | p    |
|---------------------------------------------------|-----|-----|------|---------|------|-----|------|----------|----|------|
|                                                   |     | n   | %    | No      | %    |     |      |          |    |      |
| PBO (prevents burn out)<br>improving recruitment: | Yes | 81  | 54.0 | 33      | 53.2 | 48  | 54.5 | 0.03     | 1  | 0.87 |
|                                                   | No  | 69  | 46.0 | 29      | 46.8 | 40  | 45.5 |          |    |      |
| PBO improved management:                          | Yes | 90  | 60.0 | 34      | 54.8 | 56  | 63.6 | 1.17     | 1  | 0.28 |
|                                                   | No  | 60  | 40.0 | 28      | 45.2 | 32  | 36.4 |          |    |      |
| PBO Support:                                      | Yes | 52  | 34.7 | 26      | 41.9 | 26  | 29.5 | 2.47     | 1  | 0.12 |
|                                                   | No  | 98  | 65.3 | 36      | 58.1 | 62  | 70.5 |          |    |      |
| PBO mentorship:                                   | Yes | 19  | 12.7 | 7       | 11.3 | 12  | 13.6 | 0.18     | 1  | 0.67 |
|                                                   | No  | 131 | 87.3 | 55      | 88.7 | 76  | 86.4 |          |    |      |
| PBO empathic administration:                      | Yes | 22  | 14.7 | 8       | 12.9 | 14  | 15.9 | 0.26     | 1  | 0.61 |
|                                                   | No  | 128 | 85.3 | 54      | 87.1 | 74  | 84.1 |          |    |      |
| PBO improved staff relationships:                 | Yes | 35  | 23.3 | 17      | 27.4 | 18  | 20.5 | 0.99     | 1  | 0.32 |
|                                                   | No  | 115 | 76.7 | 45      | 72.6 | 70  | 79.5 |          |    |      |
| PBO reduced hours:                                | Yes | 74  | 49.3 | 25      | 40.3 | 49  | 55.7 | 3.43     | 1  | 0.06 |
|                                                   | No  | 76  | 50.7 | 37      | 59.7 | 39  | 44.3 |          |    |      |
| PBO emotional support:                            | Yes | 14  | 9.3  | 7       | 11.3 | 7   | 8.0  | 0.48     | 1  | 0.49 |
|                                                   | No  | 136 | 90.7 | 55      | 88.7 | 81  | 92.0 |          |    |      |
| PBO acknowledgement:                              | Yes | 29  | 19.3 | 14      | 22.6 | 15  | 17.0 | 0.71     | 1  | 0.40 |
|                                                   | No  | 121 | 80.7 | 48      | 77.4 | 73  | 83.0 |          |    |      |
| PBO improved training:                            | Yes | 26  | 17.3 | 12      | 19.4 | 14  | 15.9 | 0.30     | 1  | 0.58 |
|                                                   | No  | 124 | 82.7 | 50      | 80.6 | 74  | 84.1 |          |    |      |
