# Supplementary material for: Burnout, anxiety and depression risk in medical doctors working in KwaZulu-Natal Province, South Africa: Evidence from a multi-site study of resource-constrained government hospitals in a generalised HIV epidemic setting
Source: PubMed Central journal article supplement (PMC7556533; doi:10.1371/journal.pone.0239753), 2020-10-14
Supplement: pone.0239753.s005.pdf [file pone.0239753.s005.pdf]

**Table 4.**

Sociodemographic and occupational covariates of anxiety and depression based on regression models in the ZABRE study on MDs

|                               |                                       | GAD-7  |       |       |        |        | PHQ-9  |       |       |        |        |
|-------------------------------|---------------------------------------|--------|-------|-------|--------|--------|--------|-------|-------|--------|--------|
|                               |                                       | adj OR | SE    | p     | 95% CI |        | adj OR | SE    | p     | 95% CI |        |
| Burnout (High EE or High DP): | [No]                                  |        |       |       |        |        |        |       |       |        |        |
|                               | Yes                                   | 8.62   | 5.98  | <0.01 | 2.21   | 33.59  | 13.83  | 10.59 | <0.01 | 3.08   | 62.00  |
| Age category:                 | [<30]                                 |        |       |       |        |        |        |       |       |        |        |
|                               | 30-39                                 | 29.54  | 43.9  | 0.02  | 1.61   | 543.69 | 6.33   | 6.35  | 0.07  | 0.88   | 45.28  |
|                               | 40+                                   | 27.62  | 46.18 | 0.04  | 1.04   | 732.21 | 21.23  | 27.75 | 0.02  | 1.64   | 275.2  |
| Gender:                       | [Male]                                |        |       |       |        |        |        |       |       |        |        |
|                               | Female                                | 2.01   | 1.11  | 0.21  | 0.68   | 5.92   | 3.85   | 2.27  | 0.02  | 1.21   | 12.22  |
| Marital status:               | [Single/Divorced]                     |        |       |       |        |        |        |       |       |        |        |
|                               | Married                               | 0.46   | 0.29  | 0.22  | 0.13   | 1.59   | 0.42   | 0.27  | 0.18  | 0.12   | 1.49   |
| Race:                         | [Black]                               |        |       |       |        |        |        |       |       |        |        |
|                               | White/Coloured/Other                  | 1.10   | 1.03  | 0.92  | 0.18   | 6.92   | 2.00   | 1.85  | 0.45  | 0.33   | 12.19  |
|                               | Indian                                | 1.97   | 1.69  | 0.43  | 0.37   | 10.59  | 2.55   | 2.16  | 0.27  | 0.48   | 13.43  |
| Discipline:                   | [General medicine]                    |        |       |       |        |        |        |       |       |        |        |
|                               | Surgery                               | 0.26   | 0.30  | 0.25  | 0.03   | 2.62   | 0.57   | 0.54  | 0.55  | 0.09   | 3.60   |
|                               | Psychiatry                            | 0.19   | 0.23  | 0.16  | 0.02   | 1.95   | 0.13   | 0.15  | 0.09  | 0.01   | 1.34   |
|                               | Paediatrics                           | 0.77   | 0.61  | 0.74  | 0.16   | 3.63   | 0.84   | 0.69  | 0.83  | 0.17   | 4.24   |
|                               | Obstetrics and gynaecology            | 2.57   | 2.28  | 0.29  | 0.45   | 14.66  | 4.41   | 3.98  | 0.1   | 0.75   | 25.85  |
|                               | Family medicine/Trauma and emergency  | 0.35   | 0.44  | 0.4   | 0.03   | 4.14   | 0.55   | 0.59  | 0.58  | 0.07   | 4.48   |
|                               | Anaesthetics                          | 1.46   | 1.38  | 0.69  | 0.23   | 9.35   | 0.16   | 0.23  | 0.2   | 0.01   | 2.67   |
| Occupation rank:              | [Specialist]                          |        |       |       |        |        |        |       |       |        |        |
|                               | Intern                                | 9.20   | 15.17 | 0.18  | 0.36   | 233.18 | 11.06  | 14.93 | 0.08  | 0.79   | 155.66 |
|                               | Medical officer band/Clinical Manager | 1.04   | 0.76  | 0.96  | 0.25   | 4.33   | 6.45   | 5.76  | 0.04  | 1.12   | 37.09  |
|                               | Registrar                             | 0.37   | 0.37  | 0.32  | 0.05   | 2.60   | 1.04   | 1.14  | 0.97  | 0.12   | 8.93   |
| Overtime (On and Off-site):   | Combined hours                        | 1.00   | 0.01  | 0.83  | 0.98   | 1.01   | 1.01   | 0.01  | 0.03  | <0.01  | 1.02   |
